# Supplementary material for: Low Specificity but Dissimilar Mycorrhizal Communities Associating with Roots May Contribute to the Spatial Pattern of Four Co-Occurring Habenaria (Orchidaceae) Species
Source: MDPI journal article supplement (doi:10.3390/ijms24010665), 2022-12-30
Supplement: s1 [file s1]

**Table S1.** Number of sequences and OTUs generated using UPARSE per primer pairs and percentage retained after manual screening of BLAST identifies.

|                    | Total <sup>a</sup> |      | Confident fungal ID <sup>b</sup> (Total endophytic fungi) |               | Mycorrhizal <sup>c</sup> (OMF) |            | Unidentified   |              |
|--------------------|--------------------|------|-----------------------------------------------------------|---------------|--------------------------------|------------|----------------|--------------|
|                    | Sequences          | OTUs | Sequences                                                 | OTUs          | Sequences                      | OTUs       | Sequences      | OTUs         |
| <b>ITS3/ITS4OF</b> | 1844402            | 1175 | 1715590 (93.02%)                                          | 944(80.34%)   | 76218 (4.13%)                  | 65 (5.53%) | 127060 (6.89%) | 217 (18.46%) |
| <b>ITS86F/ITS4</b> | 2175653            | 1627 | 1642501 (75.49%)                                          | 1456 (89.49%) | 9234 (0.42%)                   | 39 (2.4%)  | 8424 (0.39%)   | 62 (3.81%)   |

<sup>a</sup>OTUs was calculated at 3% sequences dissimilarity and removed the low frequency OTUs with abundance < 0.001%

<sup>b</sup> OTU identities sharing > 90% sequence similarity with fungal species and which are based on sequence lengths >150 bp.

<sup>c</sup> Confident fungal OTUs with BLAST results matching fungal families described as OrM in the studied orchid species (Table S2).

**Table S2.** List of fungal taxa known or suspected to form orchid mycorrhizal (OMF associations with Orchidaceae species which was used to identify sequences corresponding to potential OMF. Analyses were restricted to those fungal taxa previously characterized in the studied species (*Habenaria* species) and other green terrestrial orchids, which are indicated in bold (adapted from Dearnaley *et al.*, 2012).

| Phylum        | Sub phylum       | Class              | Order          | Family                   | Genus          |
|---------------|------------------|--------------------|----------------|--------------------------|----------------|
| Basidiomycota | Pucciniomycotina | Atractiellomycetes |                |                          |                |
|               | Agaricomycotina  | Agaricomycetes     | Agaricales     | Agaricaceae              | Coprinus       |
|               |                  |                    |                | Inocybaceae              | Inocybe        |
|               |                  |                    |                | Marasmiaceae             | Gymnopus       |
|               |                  |                    |                |                          | Marasmius      |
|               |                  |                    |                | Mycenaceae               | Mycena         |
|               |                  |                    |                | Psathyrellaceae          | Psathyrella    |
|               |                  |                    |                | Strophariaceae           | Hymenogaster   |
|               |                  |                    | Cantharellales | <b>Ceratobasidiaceae</b> | Ceratobasidium |
|               |                  |                    |                |                          | Thanatephorus  |
|               |                  |                    |                | <b>Tulasnellaceae</b>    | Tulasnella     |
|               |                  |                    | Sebacinales    | <b>Serendipitaceae</b>   |                |
|               |                  |                    | Thelephorales  | <b>Thelephoraceae</b>    | Thelephora     |
|               |                  |                    |                |                          | Tomentella     |
|               |                  |                    | Russulales     | Russulaceae              | Russula        |
| Ascomycota    | Pezizomycotina   | Pezizomycetes      | Pezizales      | Tuberaceae               | Tuber          |
|               |                  |                    |                | Pezizaceae               | Piziza         |
|               |                  | Sordariomycetes    | Incertaedis    | Glomerellaceae           | Colletotrichum |
|               |                  | Leotiomycetes      | Helotiales     | Vibrissaceae             | Phialocephala  |

**Table S3.** Orchid mycorrhizal fungal (OMF) OTUs<sup>a</sup> detected by primer pairs ITS3/ITS4OF and IT86F/ITS4 and their frequency of association<sup>b</sup> with the different orchid species studies (*Habenaria davidii*, *Habenaria fordii*, *Habenaria petelotii* and *Habenaria limprichtii*).

| OUT identity based on Genbank match<br>(Phylum-Family-OUT N°) | Genbank<br>Accession | <i>H. davidii</i>     |                    | <i>H. fordii</i>      |                    | <i>H. petelotii</i>   |                    | <i>H. limprichtii</i> |                    | Sequences |
|---------------------------------------------------------------|----------------------|-----------------------|--------------------|-----------------------|--------------------|-----------------------|--------------------|-----------------------|--------------------|-----------|
|                                                               |                      | Individuals<br>(X/10) | Association<br>(%) | Individuals<br>(X/10) | Association<br>(%) | Individuals<br>(X/10) | Association<br>(%) | Individuals<br>(X/10) | Association<br>(%) |           |
| Basidiomycota-Ceratobasidiaceae-Ceratobasidium-8465           | WL1                  | 1                     | 0.77               | 1                     | 0.02               | 4                     | 99.21              |                       |                    | 11648     |
| Basidiomycota-Ceratobasidiaceae-Ceratobasidium-4479           | 2                    | 1                     | 0.13               |                       |                    | 3                     | 99.87              |                       |                    | 11545     |
| Basidiomycota-Ceratobasidiaceae-Thanatephorus-6599            | 3                    |                       |                    | 2                     | 99.78              |                       |                    | 1                     | 0.22               | 1359      |
| Basidiomycota-Ceratobasidiaceae-Ceratobasidium-1924           | 4                    |                       |                    | 4                     | 100                |                       |                    |                       |                    | 970       |
| Basidiomycota-Ceratobasidiaceae-Thanatephorus-863             | 5                    | 1                     | 100                |                       |                    |                       |                    |                       |                    | 20        |
| Basidiomycota-Ceratobasidiaceae-unidentified-245              | 6                    | 3                     | 73.39              |                       |                    | 1                     | 0.07               | 2                     | 26.53              | 1353      |
| Basidiomycota-Ceratobasidiaceae- unidentified -2051           | 7                    | 1                     | 94.78              |                       |                    |                       |                    | 1                     | 5.22               | 134       |
| Basidiomycota-Ceratobasidiaceae- unidentified -7264           | 8                    |                       |                    |                       |                    |                       |                    | 1                     | 100                | 47        |
| Basidiomycota-Ceratobasidiaceae- unidentified -7786           | 9                    | 1                     | 100                |                       |                    |                       |                    |                       |                    | 27        |
| Basidiomycota-Tulasnellaceae-Tulasnella-3199                  | 10                   | 1                     | 0.48               |                       |                    |                       |                    | 3                     | 99.52              | 210       |
| Basidiomycota-Tulasnellaceae- unidentified -2530              | 11                   | 3                     | 7.59               | 3                     | 8.01               | 9                     | 84.39              | 2                     | 0.01               | 10489     |
| Basidiomycota-Tulasnellaceae-unidentified-5460                | 12                   | 2                     | 99.86              | 1                     | 0.02               |                       |                    | 1                     | 0.12               | 6403      |
| Basidiomycota-Tulasnellaceae- unidentified -4881              | 13                   | 1                     | 100                |                       |                    |                       |                    |                       |                    | 20        |
| Basidiomycota-Serendipitaceae-unidentified-4197               | 14                   | 2                     | 4.94               | 1                     | 0.31               | 4                     | 67.77              | 2                     | 26.98              | 971       |
| Basidiomycota-Serendipitaceae-unidentified-6321               | 15                   |                       |                    | 3                     | 100                |                       |                    |                       |                    | 203       |
| Basidiomycota-Serendipitaceae-unidentified-7878               | 16                   | 1                     | 32.14              | 2                     | 67.86              |                       |                    |                       |                    | 168       |
| Basidiomycota-Serendipitaceae-unidentified-1821               | 17                   | 1                     | 99.22              |                       |                    | 1                     | 0.78               |                       |                    | 128       |
| Basidiomycota-Serendipitaceae-unidentified-7937               | 18                   |                       |                    |                       |                    | 2                     | 99.19              | 1                     | 0.81               | 123       |
| Basidiomycota-Serendipitaceae-unidentified-4329               | 19                   |                       |                    | 2                     | 100                |                       |                    |                       |                    | 75        |
| Basidiomycota-Serendipitaceae-unidentified-695                | 20                   |                       |                    |                       |                    | 1                     | 100                |                       |                    | 40        |
| Basidiomycota-Serendipitaceae-unidentified-2493               | 21                   |                       |                    |                       |                    |                       |                    | 2                     | 100                | 32        |
| Basidiomycota-Serendipitaceae-unidentified-2854               | 22                   |                       |                    |                       |                    |                       |                    | 1                     | 100                | 29        |
| Basidiomycota-Serendipitaceae-Sebacina-2511                   | 23                   |                       |                    | 1                     | 100                |                       |                    |                       |                    | 28        |
| Basidiomycota-Serendipitaceae-unidentified-3531               | 24                   |                       |                    |                       |                    |                       |                    | 1                     | 100                | 25        |
| Basidiomycota-Serendipitaceae-unidentified-1249               | 25                   | 1                     | 100                |                       |                    |                       |                    |                       |                    | 24        |
| Basidiomycota-Serendipitaceae-unidentified-3434               | 26                   |                       |                    |                       |                    |                       |                    | 1                     | 100                | 23        |
| Basidiomycota-Serendipitaceae-unidentified-6031               | 27                   |                       |                    | 1                     | 100                |                       |                    |                       |                    | 20        |
| Basidiomycota-Thelephoraceae-Tomentella-1283                  | 28                   | 3                     | 99.77              | 2                     | 0.16               |                       |                    | 1                     | 0.08               | 2565      |
| Basidiomycota-Thelephoraceae-Tomentella-1480                  | 29                   |                       |                    | 2                     | 99.95              |                       |                    | 1                     | 0.05               | 2189      |
| Basidiomycota-Thelephoraceae-Tomentella-4421                  | 30                   | 2                     | 3.92               | 3                     | 95.94              |                       |                    | 1                     | 0.14               | 1430      |
| Basidiomycota-Thelephoraceae-Tomentella-3736                  | 31                   | 2                     | 99.84              | 1                     | 0.16               |                       |                    |                       |                    | 1282      |
| Basidiomycota-Thelephoraceae-Tomentella-2458                  | 32                   | 3                     | 99.51              | 2                     | 0.20               |                       |                    | 1                     | 0.29               | 1017      |
| Basidiomycota-Thelephoraceae-Tomentella-2693                  | 33                   |                       |                    |                       |                    | 2                     | 100                |                       |                    | 651       |
| Basidiomycota-Thelephoraceae-Thelephora-4471                  | 34                   |                       |                    | 5                     | 100                |                       |                    |                       |                    | 369       |
| Basidiomycota-Thelephoraceae-Tomentella-8553                  | 35                   | 1                     | 100                |                       |                    |                       |                    |                       |                    | 154       |
| Basidiomycota-Thelephoraceae-Tomentella-6842                  | 36                   |                       |                    | 1                     | 100                |                       |                    |                       |                    | 147       |

ITS3/ITS4OF

|                                                      |    |   |       |   |       |   |       |   |       |       |
|------------------------------------------------------|----|---|-------|---|-------|---|-------|---|-------|-------|
| Basidiomycota-Thelephoraceae-Tomentella-2549         | 37 |   |       | 1 | 100   |   |       |   |       | 137   |
| Basidiomycota-Thelephoraceae-Tomentella-8633         | 38 | 1 | 100   |   |       |   |       |   |       | 135   |
| Basidiomycota-Thelephoraceae-Tomentella-3279         | 39 | 1 | 97.94 | 2 | 2.06  |   |       |   |       | 97    |
| Basidiomycota-Thelephoraceae-Tomentella-4761         | 40 | 1 | 100   |   |       |   |       |   |       | 91    |
| Basidiomycota-Thelephoraceae-Tomentella-2421         | 41 |   |       |   |       |   |       | 2 | 100   | 79    |
| Basidiomycota-Thelephoraceae-Tomentella-3248         | 42 |   |       | 1 | 100   |   |       |   |       | 54    |
| Basidiomycota-Thelephoraceae-Thelephora-6837         | 43 |   |       | 1 | 100   |   |       |   |       | 34    |
| Basidiomycota-Thelephoraceae-Tomentella-8162         | 44 |   |       | 1 | 100   |   |       |   |       | 33    |
| Basidiomycota-Thelephoraceae-Tomentella-6389         | 45 | 1 | 94.74 | 1 | 5.26  |   |       |   |       | 19    |
| Basidiomycota-Thelephoraceae-Tomentella-8358         | 46 | 3 | 0.15  | 6 | 99.78 |   |       | 1 | 0.07  | 14851 |
| Basidiomycota-Thelephoraceae-Tomentella-495          | 47 | 2 | 72.23 | 2 | 27.77 |   |       |   |       | 1271  |
| Basidiomycota-Thelephoraceae-Tomentella-5096         | 48 | 3 | 99.91 | 1 | 0.09  |   |       |   |       | 1127  |
| Basidiomycota-Thelephoraceae-Tomentella-3226         | 49 |   |       | 2 | 100   |   |       |   |       | 699   |
| Basidiomycota-Thelephoraceae-Tomentella-255          | 50 | 2 | 100   |   |       |   |       |   |       | 238   |
| Basidiomycota-Thelephoraceae-Tomentella-4028         | 51 | 1 | 98.53 | 1 | 1.47  |   |       |   |       | 68    |
| Basidiomycota-Thelephoraceae-Tomentella-739          | 52 |   |       | 2 | 100   |   |       |   |       | 58    |
| Basidiomycota-Thelephoraceae-Tomentella-6996         | 53 |   |       |   |       |   |       | 2 | 100   | 32    |
| Basidiomycota-Thelephoraceae-Tomentella-6038         | 54 |   |       |   |       |   |       | 1 | 100   | 27    |
| Basidiomycota- Agaricaceae-Coprinus-7218             | 55 |   |       |   |       |   |       | 1 | 100   | 32    |
| Basidiomycota- Agaricaceae-Coprinus-6035             | 56 |   |       | 1 | 100   |   |       |   |       | 104   |
| Basidiomycota- Marasmiaceae-Gymnopus-5289            | 57 |   |       | 1 | 100   |   |       |   |       | 35    |
| Basidiomycota- Marasmiaceae-Gymnopus-5100            | 58 |   |       | 1 | 100   |   |       |   |       | 32    |
| Basidiomycota- Marasmiaceae- Marasmius-3466          | 59 | 1 | 96.97 | 1 | 3.03  |   |       |   |       | 33    |
| Basidiomycota-Mycenaceae-Mycena-8108                 | 60 |   |       | 1 | 100   |   |       |   |       | 39    |
| Basidiomycota-Mycenaceae-Mycena-7472                 | 61 | 1 | 100   |   |       |   |       |   |       | 43    |
| Basidiomycota-Mycenaceae-Mycena-2057                 | 62 |   |       | 1 | 100   |   |       |   |       | 59    |
| Basidiomycota-Psathyrellaceae-Psathyrella-8675       | 63 | 1 | 51.31 | 1 | 0.38  | 3 | 27.53 | 5 | 20.78 | 799   |
| Basidiomycota-Psathyrellaceae-Psathyrella-3549       | 64 |   |       |   |       |   |       | 1 | 100   | 41    |
| Ascomycota-Pezizaceae- Piziza-4253                   | 65 |   |       |   |       |   |       | 1 | 100   | 33    |
| Basidiomycota-Ceratobasidiaceae-Ceratobasidium-1562  |    |   |       |   |       | 2 | 100   |   |       | 1484  |
| Basidiomycota-Ceratobasidiaceae-Ceratobasidium-3709  |    |   |       |   |       | 1 | 100   |   |       | 992   |
| Basidiomycota-Ceratobasidiaceae-Thanatephorus-6955   |    |   |       | 2 | 100   |   |       |   |       | 505   |
| Basidiomycota-Ceratobasidiaceae-Ceratobasidium-12552 |    |   |       | 3 | 100   |   |       |   |       | 163   |
| Basidiomycota-Ceratobasidiaceae-Ceratobasidium-11760 |    |   |       | 1 | 100   |   |       |   |       | 25    |
| Basidiomycota-Ceratobasidiaceae- unidentified -6053  |    | 2 | 17.59 | 1 | 0.93  |   |       | 3 | 81.48 | 108   |
| Basidiomycota-Tulasnellaceae-Tulasnella-6746         |    | 3 | 1.22  | 2 | 12.15 | 7 | 86.63 | 1 |       | 905   |
| Basidiomycota-Tulasnellaceae- unidentified -1207     |    |   |       | 3 | 50.28 | 2 | 49.72 | 1 |       | 354   |
| Basidiomycota-Tulasnellaceae-unidentified-4248       |    | 1 | 99    | 3 | 1.00  |   | 0.00  |   |       | 299   |
| Basidiomycota-Serendipitaceae-Sebacina-5306          |    | 3 | 99.9  | 1 | 0.10  |   | 0.00  |   |       | 1024  |
| Basidiomycota-Serendipitaceae-Sebacina-12935         |    | 1 | 84.43 | 1 | 0.55  | 1 | 15.03 |   |       | 366   |
| Basidiomycota-Serendipitaceae-unidentified-6882      |    |   |       |   |       | 1 | 20.78 | 3 | 79.22 | 77    |
| Basidiomycota-Serendipitaceae-unidentified-5070      |    | 1 | 22.95 |   |       | 1 | 52.46 | 1 | 24.59 | 61    |

|                                                |  |   |       |   |       |   |       |   |       |     |
|------------------------------------------------|--|---|-------|---|-------|---|-------|---|-------|-----|
| Basidiomycota-Serendipitaceae-identified-10201 |  |   |       | 2 | 100   |   |       |   |       | 41  |
| Basidiomycota-Serendipitaceae-identified-10954 |  |   |       |   |       |   |       | 2 | 100   | 37  |
| Basidiomycota-Serendipitaceae-identified-4695  |  | 1 | 100   |   |       |   |       |   |       | 32  |
| Basidiomycota-Serendipitaceae-Sebacina-4876    |  | 1 | 100   |   |       |   |       |   |       | 30  |
| Basidiomycota-Serendipitaceae-identified-9680  |  |   |       | 1 | 100   |   |       |   |       | 26  |
| Basidiomycota-Thelephoraceae-Thelephora-12406  |  |   |       | 2 | 100   |   |       |   |       | 189 |
| Basidiomycota-Thelephoraceae-Tomentella-3842   |  | 1 | 100   |   |       |   |       |   |       | 157 |
| Basidiomycota-Thelephoraceae-Tomentella-2198   |  | 1 | 100   |   |       |   |       |   |       | 121 |
| Basidiomycota-Thelephoraceae-Tomentella-1974   |  | 2 | 100   |   |       |   |       |   |       | 113 |
| Basidiomycota-Thelephoraceae-Tomentella-3422   |  |   |       | 1 | 100   |   |       |   |       | 86  |
| Basidiomycota-Thelephoraceae-Tomentella-7071   |  |   |       | 2 | 100   |   |       |   |       | 70  |
| Basidiomycota-Thelephoraceae-Tomentella-5401   |  |   |       |   |       | 1 | 100   |   |       | 65  |
| Basidiomycota-Thelephoraceae-Tomentella-4663   |  | 1 | 30.77 | 1 | 69.23 |   |       |   |       | 26  |
| Basidiomycota-Thelephoraceae-Tomentella-1649   |  |   |       | 1 | 100   |   |       |   |       | 25  |
| Basidiomycota-Thelephoraceae-identified-6337   |  |   |       | 3 | 100   |   |       |   |       | 770 |
| Basidiomycota-Thelephoraceae-identified-4186   |  | 1 | 100   |   |       |   |       |   |       | 56  |
| Ascomycota-Vibrissaceae-Phialocephala-10782    |  |   |       |   |       |   |       | 1 | 100   | 25  |
| Ascomycota-Vibrissaceae-Phialocephala-13239    |  | 3 | 50    | 1 | 2     | 1 | 48    |   |       | 50  |
| Ascomycota -Tuberaceae-Tuber-4880              |  | 1 | 60.29 |   |       |   |       | 1 | 39.71 | 68  |
| Ascomycota -Tuberaceae-Tuber-1233              |  |   |       | 3 | 100   |   |       |   |       | 206 |
| Glomerellaceae-Colletotrichum-4513             |  | 2 | 13.65 | 4 | 83.76 | 1 | 0.37  | 1 | 2.21  | 271 |
| Glomerellaceae-Colletotrichum-8833             |  | 3 | 34.29 |   |       | 2 | 65.71 |   |       | 70  |
| Glomerellaceae-Colletotrichum-12073            |  |   |       |   |       | 1 | 13.2  | 1 | 86.8  | 197 |
| Basidiomycota-Inocybaceae-Inocybe-5181         |  |   |       | 2 | 85.37 | 1 | 14.63 |   |       | 41  |
| Basidiomycota-Mycenaceae-Mycena-884            |  | 4 | 100   |   |       |   |       |   |       | 60  |
| Basidiomycota-Russulaceae-Russula-11282        |  |   |       |   |       | 1 | 100   |   |       | 39  |

<sup>a</sup> OTUs were calculated at 3% sequence dissimilarity. Only OTUs representing fungal taxa described as OMF in the studied orchid species (Table S2) were included.

<sup>b</sup> OUT frequencies of association% = The sequence of an OUT in a species/Total sequences of the OUT\*100.

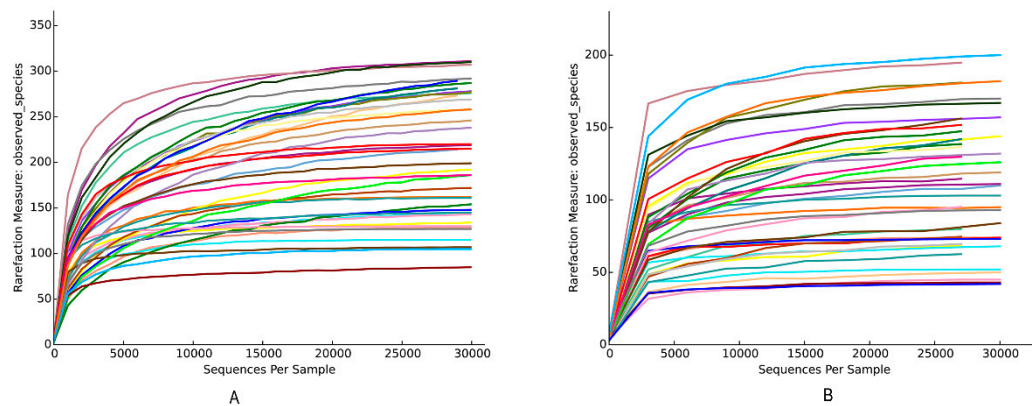

**Figure S1.** Rarefaction curves of fungal OTU (operational taxonomic unit) richness in the four *Habenaria* species with difference primer pairs. (A) ITS3/ITS4OF and (B) ITS86F/ITS4.

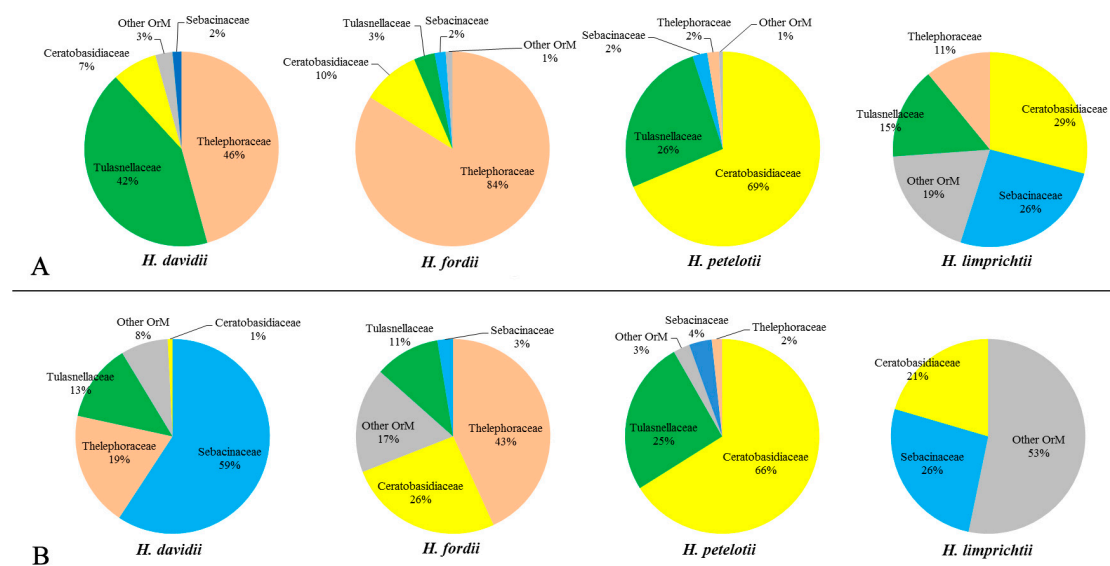

**Figure S2.** Frequency distribution of identified operational taxonomic units (OTUs) of the four most abundant OMF families (Ceratobasidiaceae, Tulasnellaceae, Thelephoraceae and Serendipitaceae) and the other OMF (the other OMF genus described in Table S2) obtained from the roots of the four studied *Habenaria* species using primer pairs (A) ITS3/ITS4OF and (B) ITS86F/ITS4.
